# Supplementary material for: Hydrogen adsorption and diffusion through a two dimensional sheet of lithium: a first principles study
Source: Royal Society of Chemistry journal article supplement (doi:10.1039/d2cp05285g), 2023-01-01
Supplement: d2cp05285g1.pdf [file d2cp05285g1.pdf]

# Hydrogen adsorption and diffusion through a two dimensional sheet of Lithium: A first principles study

Shrijan Roy,<sup>\*a</sup> Prince Singh,<sup>a‡</sup> Kiran Yadav,<sup>a‡</sup> and Nirat Ray<sup>a</sup>

Department of Materials Science and Engineering, Indian Institute of Technology Delhi, Hauz Khas, New Delhi 110016, India

## Supplementary Information

### A. Effect of supercell size on adsorption energies.

| <i>Supercell Size</i>                   | <i>2*2*1</i>                                                                        | <i>4*4*1</i>                                                                         | <i>8*8*1</i>                                                                          |
|-----------------------------------------|-------------------------------------------------------------------------------------|--------------------------------------------------------------------------------------|---------------------------------------------------------------------------------------|
| <i>Adsorption Energy at D-site (eV)</i> | -3.01                                                                               | -3.02                                                                                | -3.05                                                                                 |
|                                         | 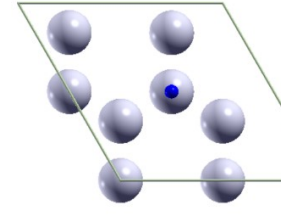 |  |  |

### B. Dispersion effects on the adsorption energies at various sites.

|                                                           |          | <i>Without dispersion</i> | <i>With dispersion effects</i> |
|-----------------------------------------------------------|----------|---------------------------|--------------------------------|
| <i>Adsorption Energy (relaxed monolayer) at site (eV)</i> | <i>D</i> | -2.723                    | -3.02                          |
|                                                           | <i>H</i> | -2.707                    | -2.84                          |
|                                                           | <i>X</i> | -2.720                    | -2.95                          |
|                                                           | <i>T</i> | -1.773                    | -1.81                          |

C. Adsorption energy, Zero point energy (ZPE) and Gibbs free energy for different sites.

|                        | <i>D site</i> | <i>X site</i> | <i>H site</i> | <i>T site</i> |
|------------------------|---------------|---------------|---------------|---------------|
| $E_{ads}$ (eV)         | -3.02         | -2.95         | -2.84         | -1.81         |
| ZPE (eV)               | 0.012         | 0.013         | 0.011         | 0.011         |
| Gibbs Free energy (eV) | 2.63          | 2.56          | 2.45          | 1.42          |

D. Coverage (upto 1 ML) Figure 2: The large structural distortions in the structure at high coverage for (a) H site and (b) X site.

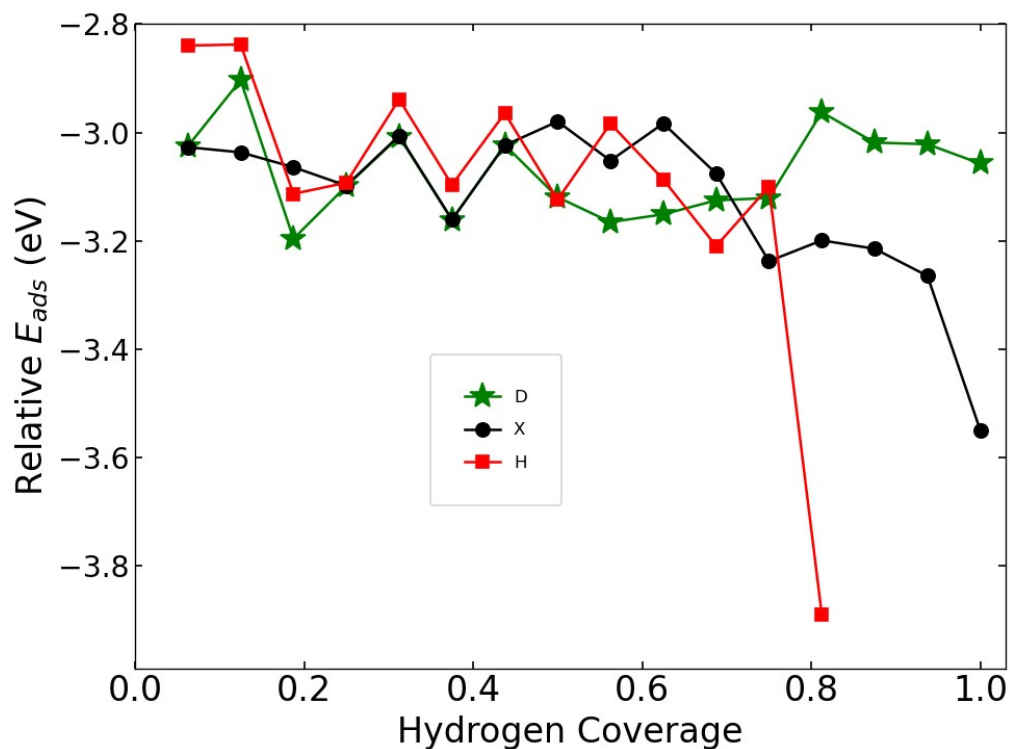

Figure S1: Adsorption energy as a function of coverage. Large structural distortions begin with high coverage for X and H sites, and are correlated with the decline in adsorption energy after 0.8.

*E. NEB calculations for diffusion of hydrogen from D to H site (asymmetric barrier)*

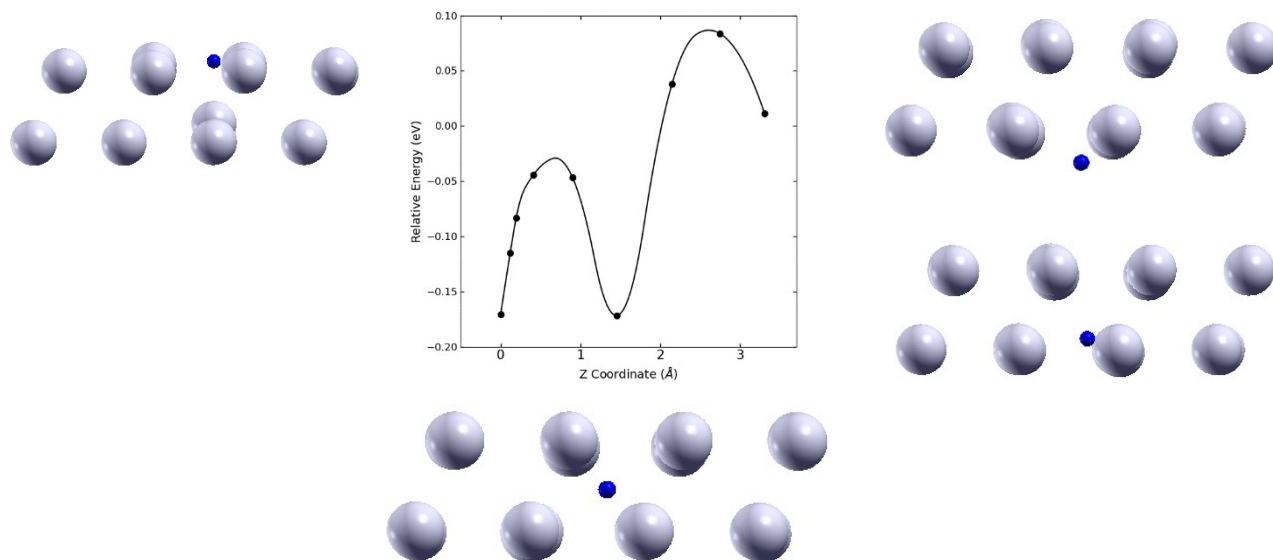

Figure S2: Diffusion of hydrogen atom from D to H.

*F. Phonon frequencies for adsorbed hydrogen*

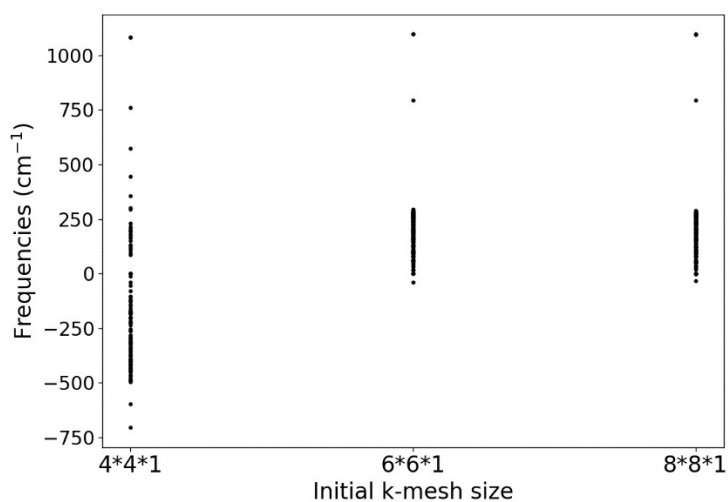

Figure S3: Gamma point phonon frequencies as a function of k-mesh used for calculation.

While the high frequency modes are not impacted by the k-mesh, the low frequency modes are extremely sensitive to the k-mesh. Small instabilities ( $\sim 1\text{-}50 \text{ cm}^{-1}$ ) are seen even at denser k-mesh values.
